# Supplementary material for: Anion- and auxiliary ligand-directed synthesis of cadmium(ii) complexes with 3,5-di(1H-imidazol-1-yl)benzoate
Source: Royal Society of Chemistry journal article supplement (doi:10.1039/c0ce00527d), 2010-11-22
Supplement: c0ce00527d.pdf [file c0ce00527d.pdf]

## Electronic supplementary information (ESI)

### Anion- and auxiliary ligand-directed synthesis of cadmium(II) complexes with 3,5-di(1H-imidazol-1-yl)benzoate †‡

Zhi Su, Yue Zhao, Min Chen, Wei-Yin Sun\*

Coordination Chemistry Institute, State Key Laboratory of Coordination Chemistry, School of Chemistry and Chemical Engineering, Nanjing National Laboratory of Microstructures, Nanjing University, Nanjing 210093, China. E-mail: sunwy@nju.edu.cn; Fax: +86 25 8331 4502

**Table S1.** Hydrogen bonding distances/ Å and angle/ ° for complexes **1** and **5**.

| D-H...A         | d(D...A) | ∠(D-H...A) |
|-----------------|----------|------------|
| <b>1</b>        |          |            |
| O5-H2...O1#1    | 2.613(3) | 164(5)     |
| C19-H4...O4#2   | 3.437(4) | 152        |
| C2-H15...O5#3   | 3.204(4) | 160        |
| C11-H20...O4#4  | 3.336(4) | 174        |
| C12-H21...O7#5  | 3.106(4) | 117        |
| <b>5</b>        |          |            |
| O10-H111...O4#1 | 3.066(5) | 131(7)     |
| O10-H111...O6#1 | 2.916(5) | 149(7)     |
| O9-H113...O2#2  | 2.999(5) | 152(6)     |
| O9-H114...O4#3  | 2.807(4) | 157(5)     |
| C8-H8...O10     | 3.366(6) | 148        |
| C10-H10...O8#4  | 3.435(4) | 165        |
| C13-H13...O5#5  | 3.084(4) | 121        |
| C13-H13...O9#2  | 3.364(5) | 147        |
| C17-H17...O10#6 | 3.406(5) | 149        |

Symmetry transformations used to generate equivalent atoms: For **1**: #1 -1+x, y, -1+z; #2 2-x, 3-y, 1-z; #3 1+x, y, 1+z; #4 2-x, 2-y, 1-z; #5 -1+x, -1+y, z. For **5**: #1 2-x, 1-y, -z; #2 1-x, 1-y, -z; #3 2-x, 2-y, -1-z; #4 1-x, 2-y, -z; #5 -1+x, -1+y, 1+z; #6 x, 1+y, z.

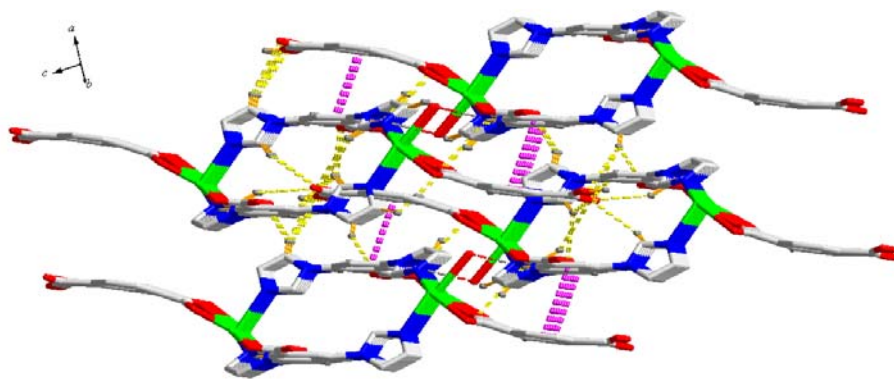

**Figure S1.** The 3D packing diagram of complex **1**, in which the pink dotted lines represent the  $\pi$ - $\pi$  interactions and the yellow ones represent the hydrogen bonds.

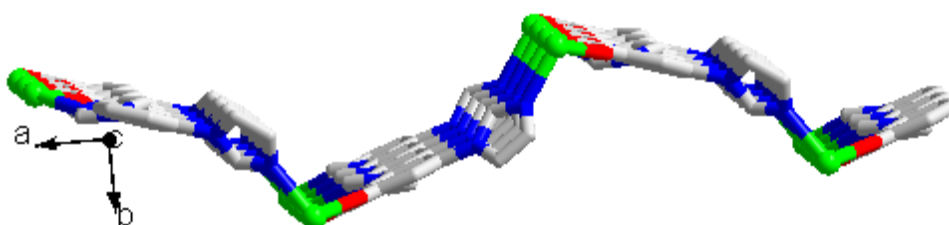

**Figure S2.** The wave-like 2D  $6^3$ -hcb layer in **2**.

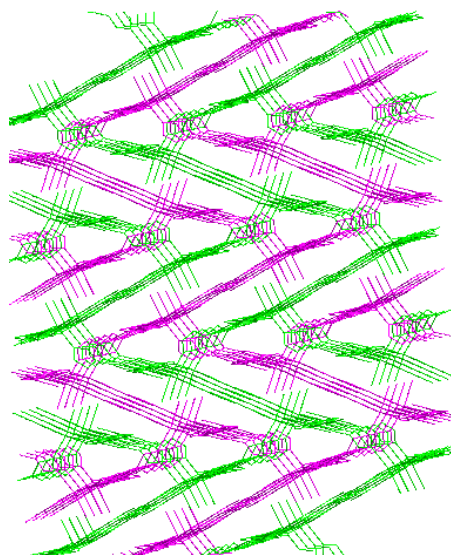

**Figure S3.** Representation of 2-fold interpenetration in complex **2**.

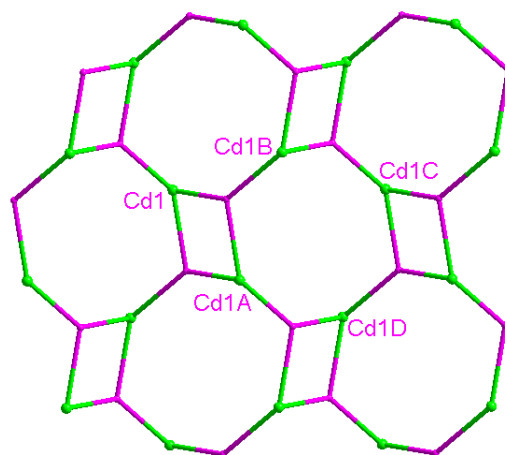

**Figure S4.** The Scheme representation of (4,8<sup>2</sup>) net in **3**.

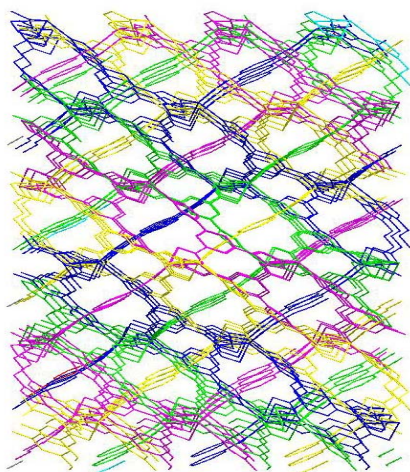

**Figure S5.** Representation of 4-fold interpenetration in complex **3**.

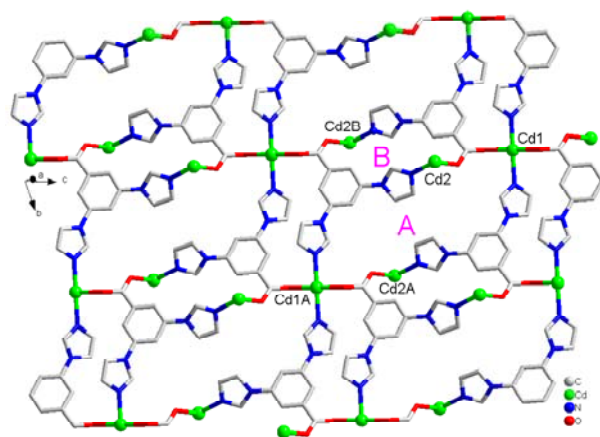

**Figure S6.** The  $L^-$ -Cd layer in **4**.

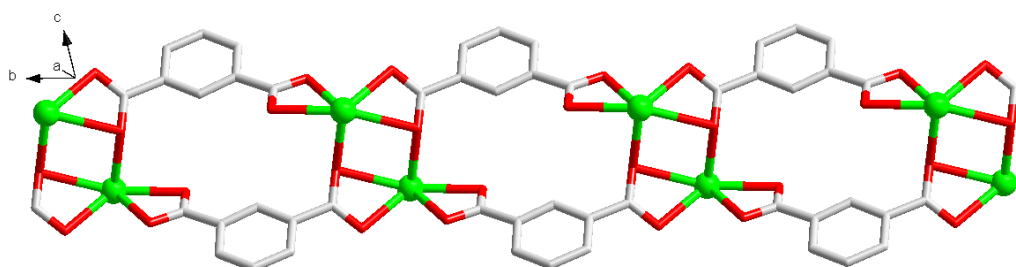

**Figure S7.** The  $MBDA^{2-}$ -Cd chain in **4**.

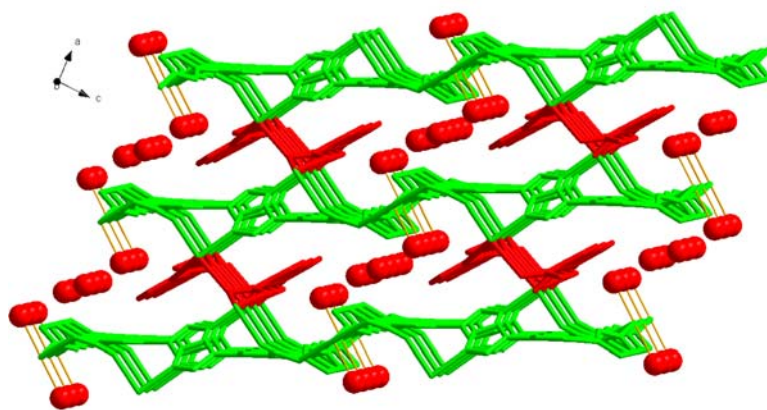

**Figure S8.** The coordinated and uncoordinated water molecules in **4** (Red:  $MBDA^{2-}$ -Cd chains; Green: the  $L^-$ -Cd layers). The red balls represented the water molecules.

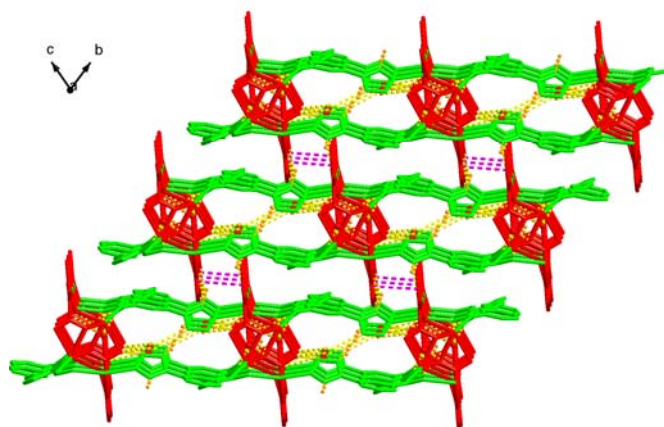

**Figure S9.** The 3D packing diagram of complex **5**, in which the pink dotted lines represented the  $\pi \cdots \pi$  interaction and the yellow ones represented the hydrogen bonds.

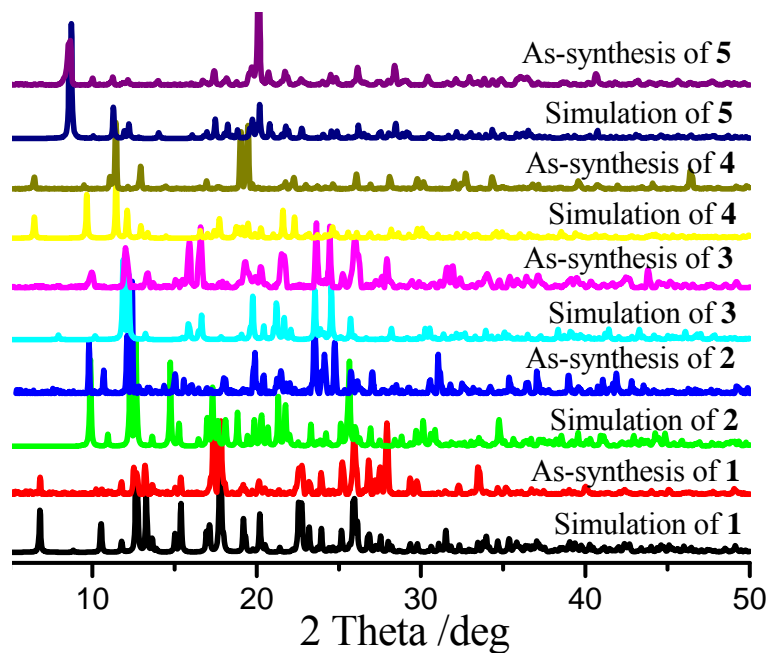

**Figure S10.** The simulated and as-synthesized PXRD of complexes **1-5**.

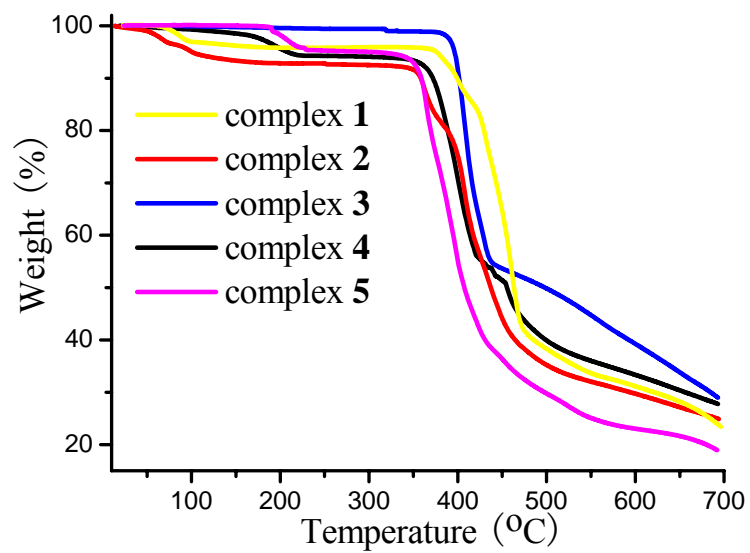

**Figure S11.** The TG curves of complexes 1-5.
